# Supplementary material
Source: Royal Society of Chemistry journal article supplement (doi:10.1039/d5fo04235f)
Supplement: d5fo04235f2.xlsx [file d5fo04235f2.xlsx]

## Sheet: Página1
estudo	ne	me	sde	nc	mc	sdc
Haidari 2019	31	-0.53	1.31	32	-0.125	1.74
Stevens 2021	39	-0.1	0.14	38	-0.1	0.14
Lockyer 2016	20	-0.33	0.47	20	-0.02	0.44
Pinckaers 2025	20	-0.4	1.14	20	0	1.06
Lamti 2025	307	-1.8	0.84	314	0.1	0.492
