# Supplementary material
Source: Royal Society of Chemistry journal article supplement (doi:10.1039/d5fo04235f)
Supplement: d5fo04235f3.xlsx [file d5fo04235f3.xlsx]

## Sheet: Página1
estudo	ne	me	sde	nc	mc	sdc
Javadi 2019	30	0.1	0.82	30	0.03	0.83
Haidari 2019	31	-0.24	0.99	32	-0.03	1.41
Stevens 2021	39	0.1	0.14	38	0	0.14
Pinckaers 2025	20	0	0.42	20	0	0.71
Lamti 2025	307	-3.6	4.18	314	0.1	0.81
