# Supplementary material
Source: Royal Society of Chemistry journal article supplement (doi:10.1039/d5fo04235f)
Supplement: d5fo04235f4.xlsx [file d5fo04235f4.xlsx]

## Sheet: Página1
estudo	ne	me	sde	nc	mc	sdc
Haidari 2019	31	0.12	0.43	32	0.06	0.46
Stevens 2021	39	-0.1	0.14	38	0	0.14
Lockyer 2016	20	-0.05	0.18	20	-0.007	0.17
Pinckaers 2025	20	-0.1	0.36	20	0	0.28
Lamti 2025	307	1	0.867	314	0	0.969
