# Supplementary material
Source: Royal Society of Chemistry journal article supplement (doi:10.1039/d5fo04235f)
Supplement: d5fo04235f5.xlsx [file d5fo04235f5.xlsx]

## Sheet: Página1
estudo	ne	me	sde	nc	mc	sdc
Javadi 2019	30	0.48	3.1	30	-0.13	2.6
Haidari 2019	31	-3.1	5.5	32	-1.9	5.4
Stevens 2021	39	-0.37	4.62	38	0.72	4.68
Pinckaers 2025	20	-0.02	2.35	20	0.17	2.66
