# Supplementary material
Source: Royal Society of Chemistry journal article supplement (doi:10.1039/d5fo04235f)
Supplement: d5fo04235f6.xlsx [file d5fo04235f6.xlsx]

## Sheet: Página1
estudo	ne	me	sde	nc	mc	sdc
Haidari 2019	31	-0.6	1.26	32	-0.18	1.51
Stevens 2021	39	0	0.14	38	-0.1	0.14
Lockyer 2016	20	-0.2	0.41	20	-0.01	0.37
Lamti 2025	307	-0.9	0.816	314	0.8	0.791
Pinckaers 2025	20	-0.3	1.2	20	0.1	0.99
