# Supplementary material
Source: Royal Society of Chemistry journal article supplement (doi:10.1039/d5fo04235f)
Supplement: d5fo04235f7.xlsx [file d5fo04235f7.xlsx]

## Sheet: Página1
estudo	ne	me	sde	nc	mc	sdc
Haidari 2019	31	-0.25	2.28	32	-0.1	2.77
Stevens 2021	39	-0.1	0.14	38	0.1	0.14
Lockyer 2016	20	-0.18	0.46	20	0.01	0.51
Pinckaers 2025	20	0.06	0.38	20	0.06	0.47
Lamti 2025	307	-0.4	1.37	314	-0.1	0.612
